# Supplementary material for: Jasmonate promotes artemisinin biosynthesis by activating the TCP14-ORA complex in Artemisia annua
Source: PubMed Central journal article supplement (PMC6317983; doi:10.1126/sciadv.aas9357), 2018-11-14
Supplement: aas9357_SM.pdf [file aas9357_SM.pdf]

## Supplementary Materials for

### **Jasmonate promotes artemisinin biosynthesis by activating the TCP14-ORA complex in *Artemisia annua***

Ya-Nan Ma, Dong-Bei Xu, Ling Li, Fei Zhang, Xue-Qing Fu, Qian Shen, Xue-Ying Lyu, Zhang-Kuanyu Wu, Qi-Fang Pan, Pu Shi, Xiao-Long Hao, Ting-Xiang Yan, Ming-Hui Chen, Pin Liu, Qian He, Li-Hui Xie, Yi-Jun Zhong, Yue-Li Tang, Jing-Ya Zhao, Li-Da Zhang, Xiao-Fen Sun, Ke-Xuan Tang\*

\*Corresponding author. Email: kxtang@sjtu.edu.cn

Published 14 November 2018, *Sci. Adv.* 4, eaas9357 (2018)

DOI: 10.1126/sciadv.aas9357

#### **This PDF file includes:**

- Fig. S1. A schematic diagram of the artemisinin biosynthetic pathway and its regulation in *A. annua*, and AaORA activates the *ADS*, *CYP71AV1*, *DBR2*, and *ALDH1* promoters.
- Fig. S2. Y2H assay showing the regions of AaORA with autoactivation activity.
- Fig. S3. Alignment of the protein sequences of AaTCP14 and 29 related proteins.
- Fig. S4. Phylogenetic analysis of TCP14 proteins from *A. annua* and other plants.
- Fig. S5. Relative expression levels of transcription factors positively regulating artemisinin biosynthesis and JA biosynthetic genes in *AaTCP14* transgenic plants.
- Fig. S6. Characterization of *A. annua* transgenic plants.
- Fig. S7. Neither AaORA nor AaJAZ8 affects the ability of AaTCP14 to bind DNA.
- Fig. S8. The expression patterns of *AaJAZ8*, MeJA-induced *AaJAZ8* degradation, and analysis of artemisinin biosynthesis in *A. annua* plants overexpressing *AaJAZ8* or *AaJAZ8 $\Delta$ jas*.
- Fig. S9. AaTCP14 and AaORA interact with AaJAZ proteins and mapping of the domains involved in the interaction between AaJAZ8, AaORA, and AaTCP14 using Y2H assays.
- Fig. S10. Artemisinin content in *AaTCP14* transgenic plants under MeJA treatment.
- Table S1. List of primers used in this study.

## SUPPLEMENTARY MATERIALS

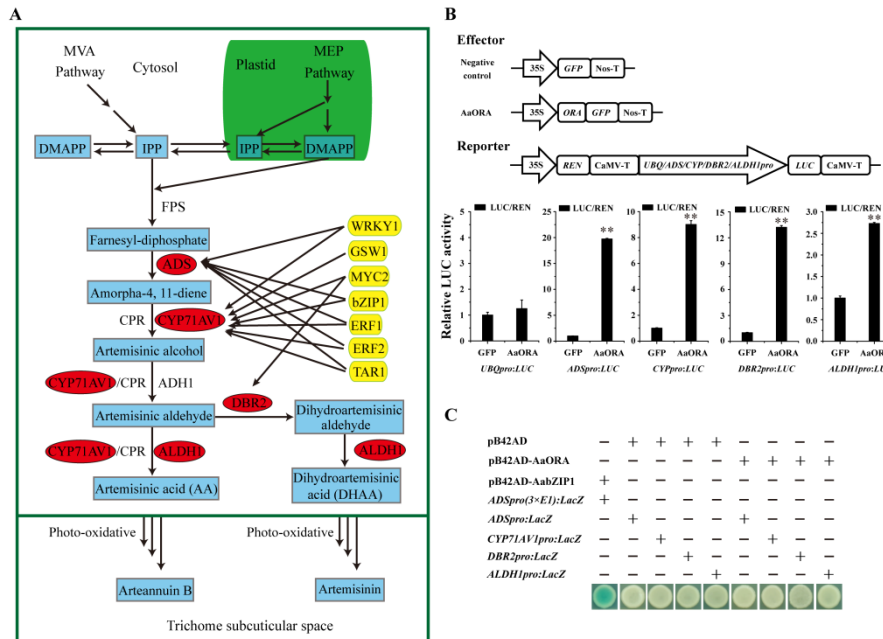

**Fig. S1. A schematic diagram of the artemisinin biosynthetic pathway and its regulation in *A. annua*, and AaORA activates the *ADS*, *CYP71AV1*, *DBR2*, and *ALDH1* promoters.**

(A) Biosynthetic pathways and regulation of artemisinin in *Artemisia annua*. MVA, mevalonate; MEP, 2-C-methyl-D-erythritol 4-phosphate; IPP, isopentenyl diphosphate; DMAPP, dimethylallyl diphosphate; FPS, farnesyl diphosphatesynthase; ADS, amorpha-4,11-diene synthase; CYP71AV1, cytochrome P450 monooxygenase; CPR, cytochrome P450 reductase; ADH1, alcohol dehydrogenase 1; DBR2, artemisinic aldehyde $\Delta$ 11(13) reductase; ALDH1, aldehyde dehydrogenase 1; WRKY1, WRKY transcription factor; GSW1, Glandular Trichome-Specific WRKY1; MYC2, basic helix-loop-helix (bHLH) transcription factor; bZIP1, basic leucine zipper transcription factor; ERF1 and ERF2, ETHYLENE-RESPONSIVE FACTOR 1 and 2; TAR1, TRICHOME AND ARTEMISININ REGULATOR 1. (B) Top, Schematic diagrams of the effector (AaORA-GFP) and reporter (35S: REN-*UBQ/ADS/CYP/DBR2/ALDH1*<sub>pro</sub>:LUC) plasmids used for the Dual-LUC assays. CYP, CYP71AV1. REN, Renilla luciferase. LUC, firefly luciferase. Bottom, Dual-LUC experiments showing the activation of the *UBQ*, *ADS*, *CYP71AV1*, *DBR2* and *ALDH1* promoters by ORA in *N. benthamiana* leaves. GFP was used as a negative control, and the LUC/REN ratios of GFP were set as 1. Three independent transfection

experiments were performed. The data represent the means  $\pm$  SD of three replicates from three independent experiments.  $**P < 0.01$ , Student's *t*-test. (C) Yeast one-hybrid assay showing that AaORA does not bind to the *ADS*, *CYP71AV1*, *DBR2* and *ALDH1* promoters. The combination of pB42AD-AabZIP1 and *ADSPro(3×E1):LacZ* was used as a positive control. Yeast cells co-expressing pB42AD, pB42AD-AaORA or pB42AD-AabZIP1 and the full-length *ADS*, *CYP71AV1*, *DBR2* or *ALDH1* promoters or the DNA motif from the *ADS* promoter were grown on selective medium, SD/-Trp/-Ura, containing 20 mg/L X-gal, and pictures were taken after 4 days of incubation at 30°C. Blue plaques indicate protein-DNA interactions. The Y1H assays were repeated three times, and representative results are shown.

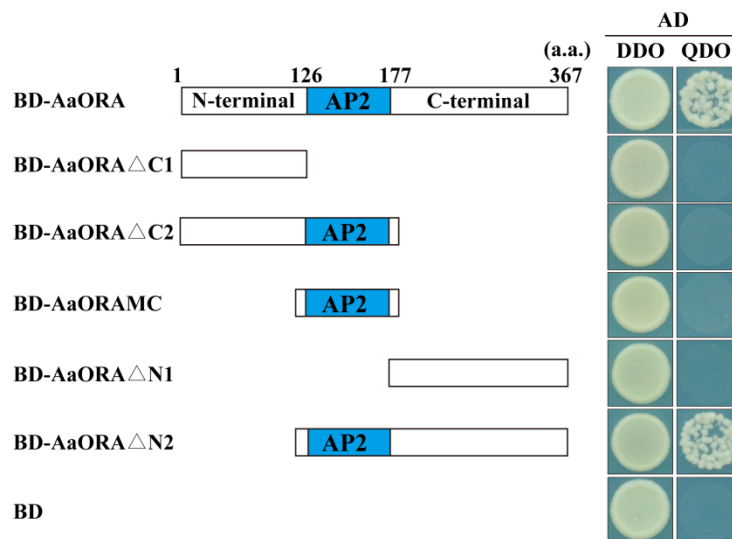

**Fig. S2. Y2H assay showing the regions of AaORA with autoactivation activity.** Left, schematic representations of the full-length and truncated AaORA proteins used in this experiment. Numbers indicate the amino acid positions of the truncated AaORA variants. The AP2 domain is indicated by a blue box. Right, Y2H assays of the interactions between AD and truncated versions of BD-AaORA. Transformed yeast cells were grown on selective medium, SD/-Trp/-Leu/-His/-Ade (QDO), and control medium, SD/-Trp/-Leu (DDO), and pictures were taken after 4 days of incubation at 30°C. The Y2H assays were repeated three times, and representative results are shown.

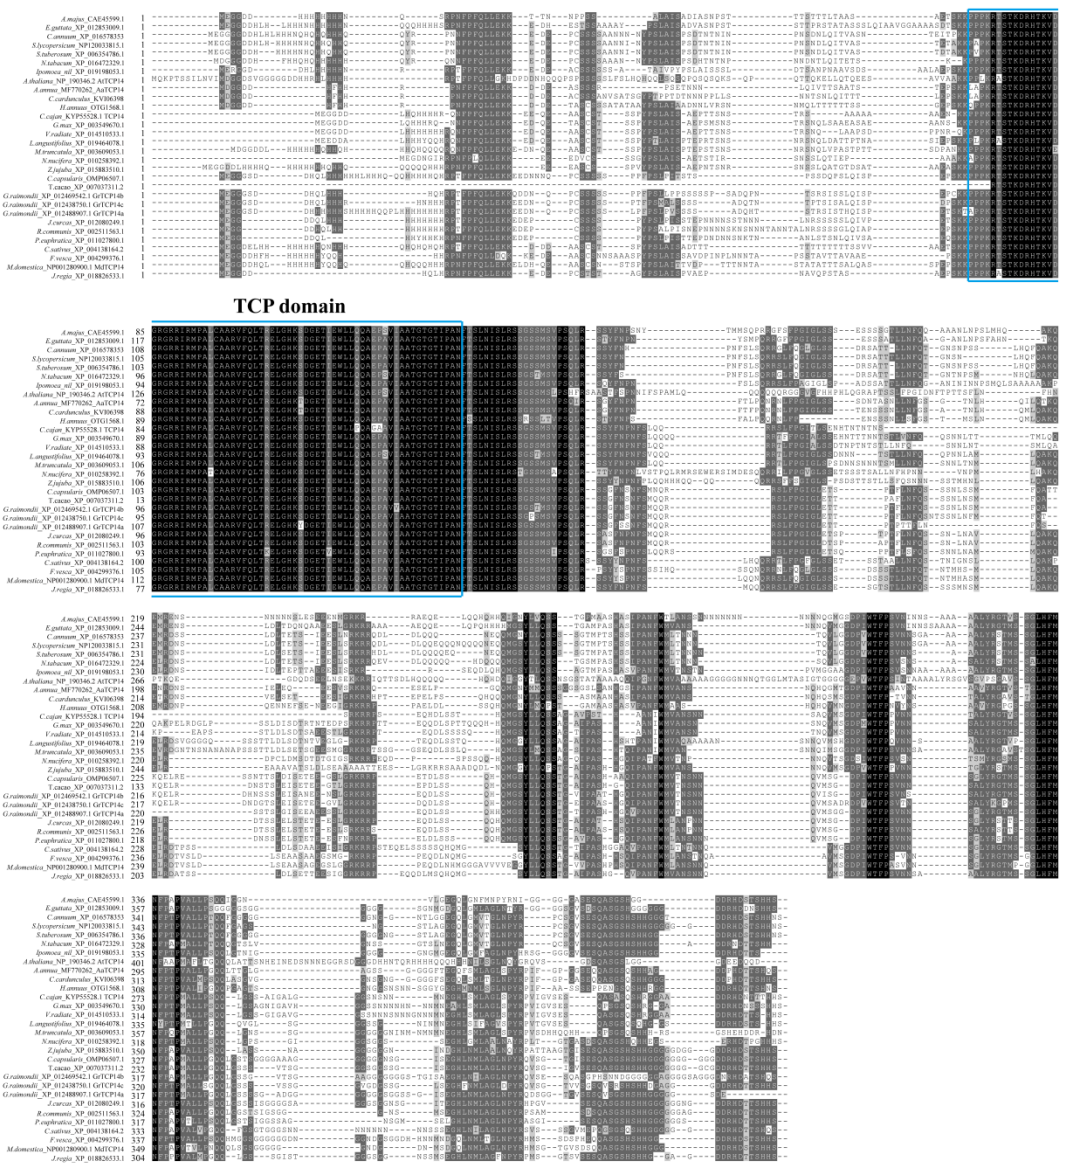

**Fig. S3. Alignment of the protein sequences of AaTCP14 and 29 related proteins.**  
 Alignment of the amino acid sequences of AaTCP14 and other TCP14 proteins. Identical amino acids are shaded in black, conserved residues are shaded in dark grey and similar residues are shaded in light grey. The conserved TCP domains are outlined with a blue box. The accession numbers of the sequences shown are as follows: CAE45599.1 from *Antirrhinum majus*; XP\_012853009.1 from *Erythranthe guttata*; XP\_016578353 from *Capsicum annuum*; NP120033815.1 from *Solanum lycopersicum*; XP\_016472329.1 from *Nicotiana tabacum*; XP\_019198053.1 from *Ipomoea nil*; AT3G47620\_ArTCP14 from *Arabidopsis thaliana*; MF770262\_AaTCP14 from *Artemisia annua*; KVI06398 from *Cynara cardunculus*; OTG1568.1 from *Helianthus annuus*; KYP55528.1 from *Cajanus cajan*;

XP\_003549670.1 from *Glycine max*; XP\_014510533.1 from *Vigna radiate*; XP\_019464078.1 from *Lupinus angustifolius*; XP\_003609053.1 from *Medicago truncatula*; XP\_010258392.1 from *Nelumbo nucifera*; XP\_015883510.1 from *Ziziphus jujube*; OMP06507.1 from *Corchorus capsularis*; XP\_007037311.2 from *Theobroma cacao*; XP\_012488907.1\_GrTCP14a, XP\_012469542.1\_GrTCP14b and XP\_012438750.1\_GrTCP14c from *Gossypium raimondii*; XP\_012080249.1 from *Jatropha curcas*; XP\_002511563.1 from *Ricinus communis*; XP\_011027800.1 from *Populus euphratica*; XP\_004138164.2 from *Cucumis sativus*; XP\_004299376.1 from *Fragaria vesca*; NP001280900.1 from *Malus domestica*; XP\_018826533.1 from *Juglans regia*.

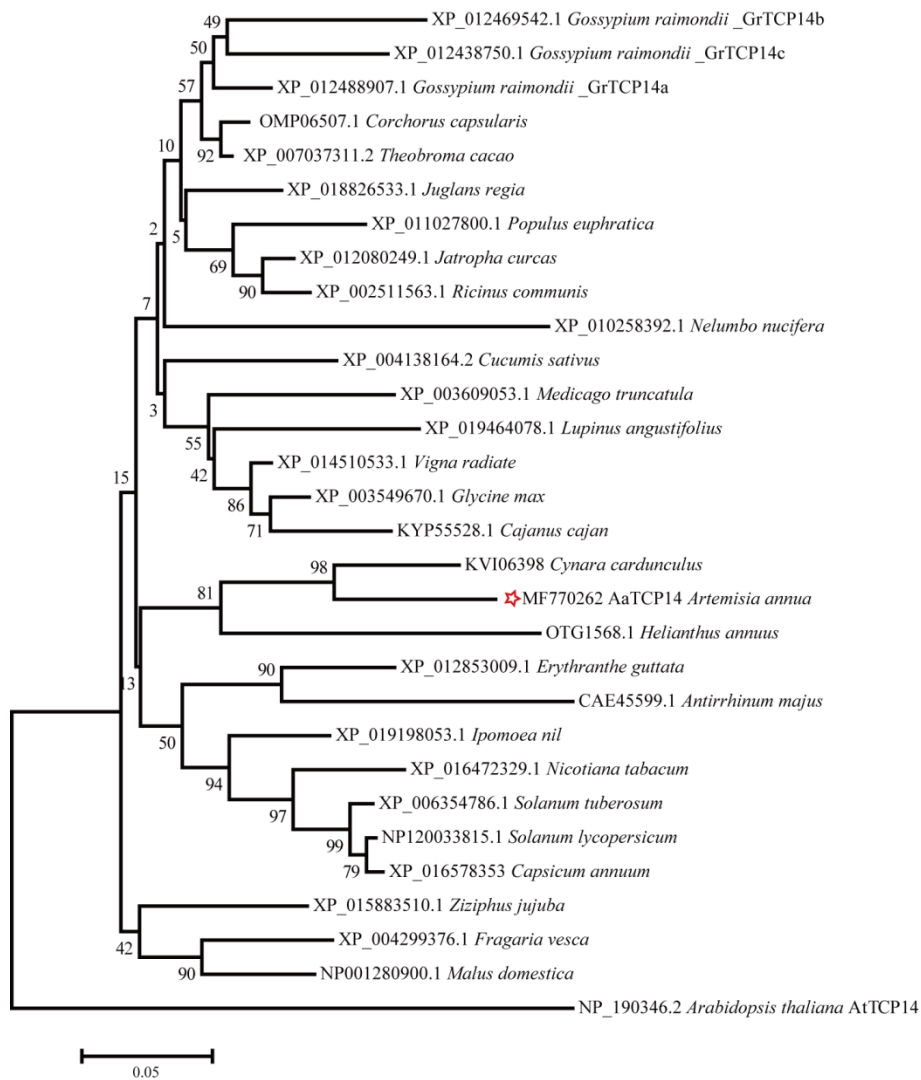

**Fig. S4. Phylogenetic analysis of TCP14 proteins from *A. annua* and other plants.** TCP14 sequences from different plant species were aligned with Clustal W, and a neighbor-joining phylogenetic tree was constructed using MEGA. Bootstrap values indicate the percentage of 1000 replicates. AaTCP14 is marked with a red star. The amino acid sequences are named based on the NCBI accession number and species name.

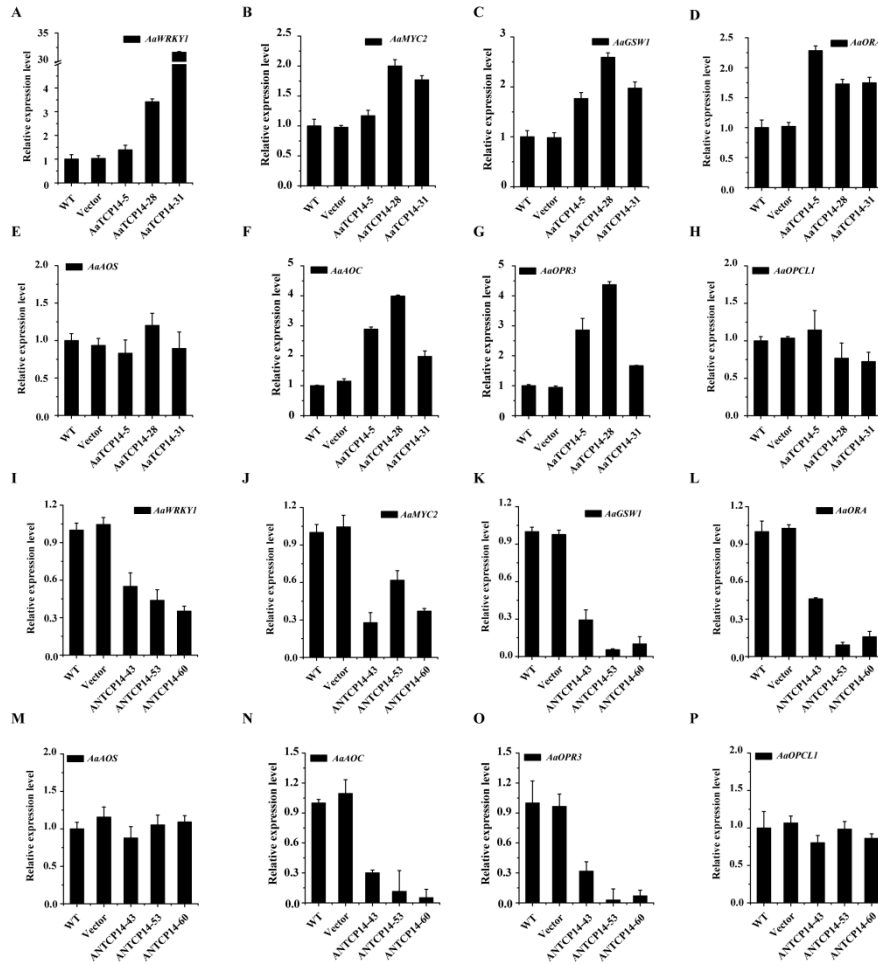

**Fig. S5. Relative expression levels of transcription factors positively regulating artemisinin biosynthesis and JA biosynthetic genes in *AaTCPI4* transgenic plants. (A-P)** The expression levels of *AaWRKY1* (A, I), *AaMYC2* (B, J), *AaGSWI* (C, K), *AaORA* (D, L), *AaAOS* (E, M), *AaAOC* (F, N), *AaOPR3* (G, O) and *AaOPCL1* (H, P) in 3-month-old *A. annua* *AaTCPI4*-overexpression and antisense (ANTCPI4) plants, plants transformed with the empty vector (Vector) and wild-type (WT) were determined by quantitative real-time PCR (qRT-PCR). *Actin* was used as an internal control. The data represent the means  $\pm$  SD of three replicates from three cutting propagations.

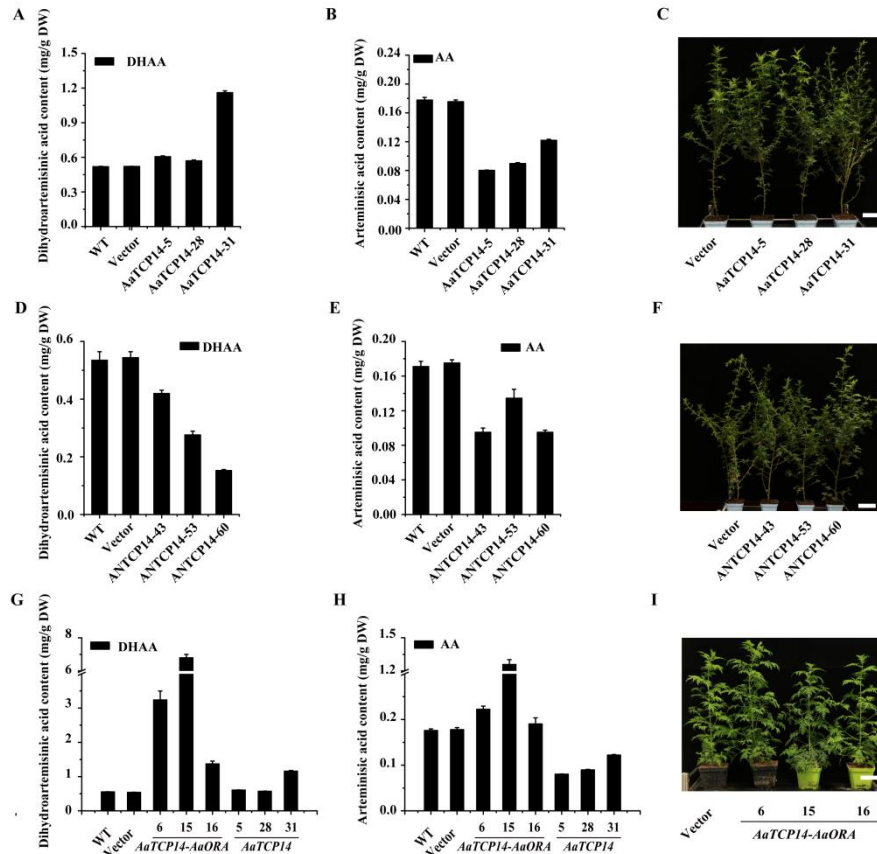

**Fig. S6. Characterization of *A. annua* transgenic plants.** (A, B, D, E, G, H) HPLC analysis of dihydroartemisinic acid (DHAA) and artemisinic acid (AA) in the leaves of different *A. annua* *AaTCPI4*-overexpression lines (A and B), *AaTCPI4*-antisense lines (D and E), *AaTCPI4*-*AaORA* co-overexpression lines (G and H), plants transformed with the empty vector (Vector) and WT plants. The data represent the means  $\pm$  SD of three replicates from three cutting propagations. (C and F) The phenotypes of 3-month-old *A. annua* plants transformed with the empty vector (control plants, labeled as Vector), three independent *AaTCPI4*-overexpression lines (C) and *AaTCPI4*-antisense lines (F). (I) The phenotypes of 2-month-old *A. annua* plants transformed with the empty vector (control plants, labeled as Vector) and three independent *AaTCPI4*-*AaORA* co-overexpression (*AaTCPI4*-*AaORA*) lines. Scale bar = 10 cm.



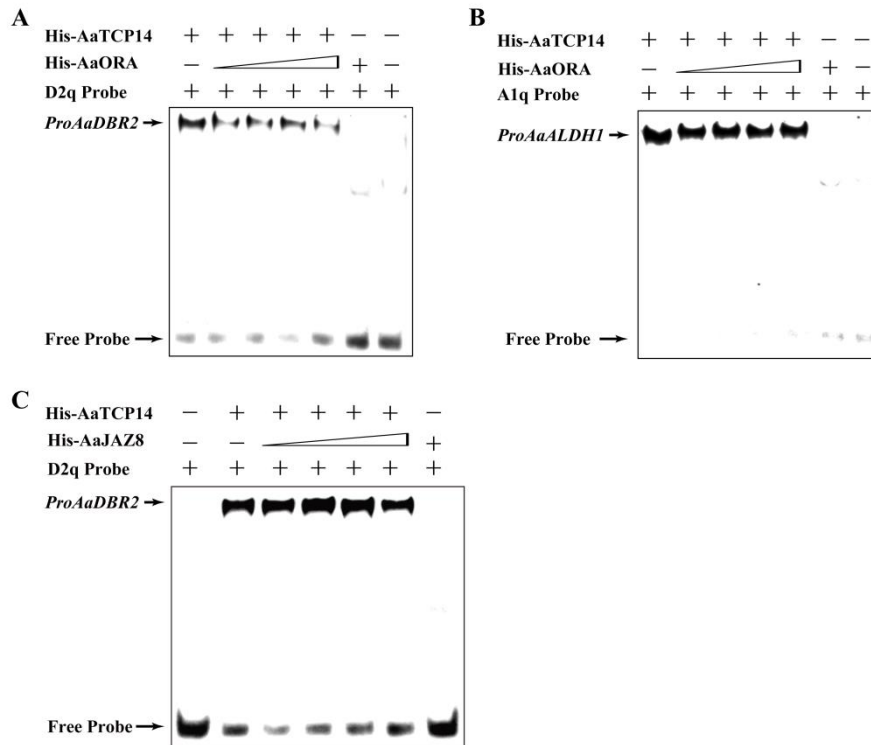

**Fig. S7. Neither AaORA nor AaJAZ8 affects the ability of AaTCP14 to bind DNA.** (A-C) EMSA assay of AaTCP14 binding to the *D2* motif from the *DBR2* promoter (A, C), and the *A1* motif from the *ALDH1* promoter (B). Binding reactions contained 0.5  $\mu$ g of His-AaTCP14 protein and an increasing amount (0.5  $\mu$ g, 1  $\mu$ g, 2  $\mu$ g, 4  $\mu$ g) of His-AaORA or His-AaJAZ8 protein. The labeled D2q and A1q probes are the same as in Fig. 4.

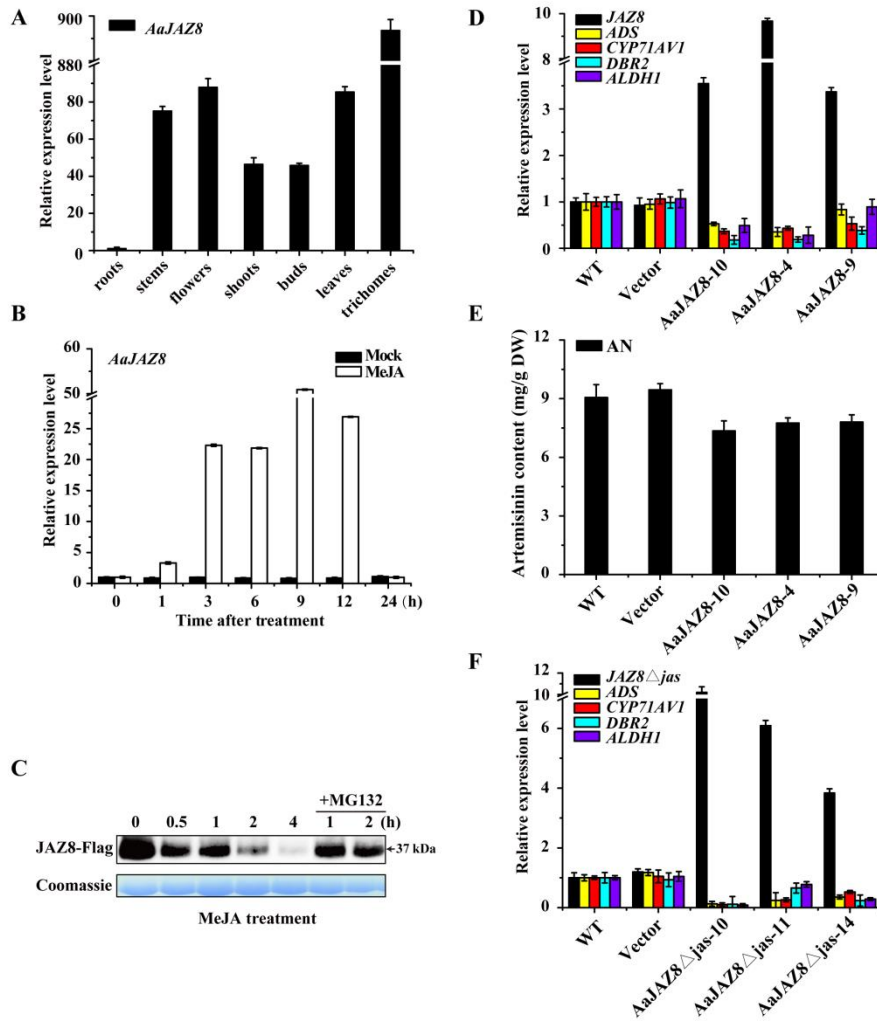

**Fig. S8. The expression patterns of *AaJAZ8*, MeJA-induced *AaJAZ8* degradation, and analysis of artemisinin biosynthesis in *A. annua* plants overexpressing *AaJAZ8* or *AaJAZ8 $\Delta$ jas*. (A) Relative expression levels of *AaJAZ8* in different tissues, including roots, stems, flowers, shoots, buds, leaves and trichomes, were measured by quantitative real-time PCR. The expression level of *AaJAZ8* in roots was set as 1. *Actin* was used as an internal control. The data represent the means  $\pm$  SD from three replicates from three independent *A. annua* plants. (B) The expression levels of *AaJAZ8* in plants treated with 100  $\mu$ M MeJA or 0.1% ethanol (Mock) over 24 hours. *Actin* was used as an internal control. The data represent the means  $\pm$  SD of three replicates from three independent *A. annua* plants. (C) MeJA stimulates *AaJAZ8* turnover in a 26S proteasome-dependent manner. *N. benthamiana* leaves expressing JAZ8-Flag were pretreated with or without the 26S proteasome inhibitor MG132 (100  $\mu$ M) for 1 hour, and then the leaves were treated with MeJA (50  $\mu$ M) for 0, 0.5, 1, 2, and 4 hours.**

Western blot analysis with anti-Flag antibody was done to measure the levels of JAZ8-Flag. A Coomassie-stained SDS-PAGE gel (Coomassie) was used to confirm equal sample loading.

**(D)** Expression levels of *JAZ8*, *ADS*, *CYP71AV1*, *DBR2* and *ALDH1* in different *A. annua* *AaJAZ8*-overexpression lines, plants transformed with the empty vector (Vector) and WT. *Actin* was used as the internal control. The data represent the means  $\pm$  SD from three replicates from three cutting propagations. **(E)** HPLC analysis of artemisinin (AN) in the leaves of

*AaJAZ8*-overexpression lines, plants transformed with the empty vector (Vector) and WT plants. The data represent the means  $\pm$  SD of three replicates from three cutting propagations.

**(F)** Expression levels of *JAZ8 $\Delta$ jas*, *ADS*, *CYP71AV1*, *DBR2* and *ALDH1* in different *A. annua* *AaJAZ8 $\Delta$ jas*-overexpression lines, plants transformed with the empty vector and WT. *Actin* was used as the internal control. The data represent the means  $\pm$  SD from three technical replicates.

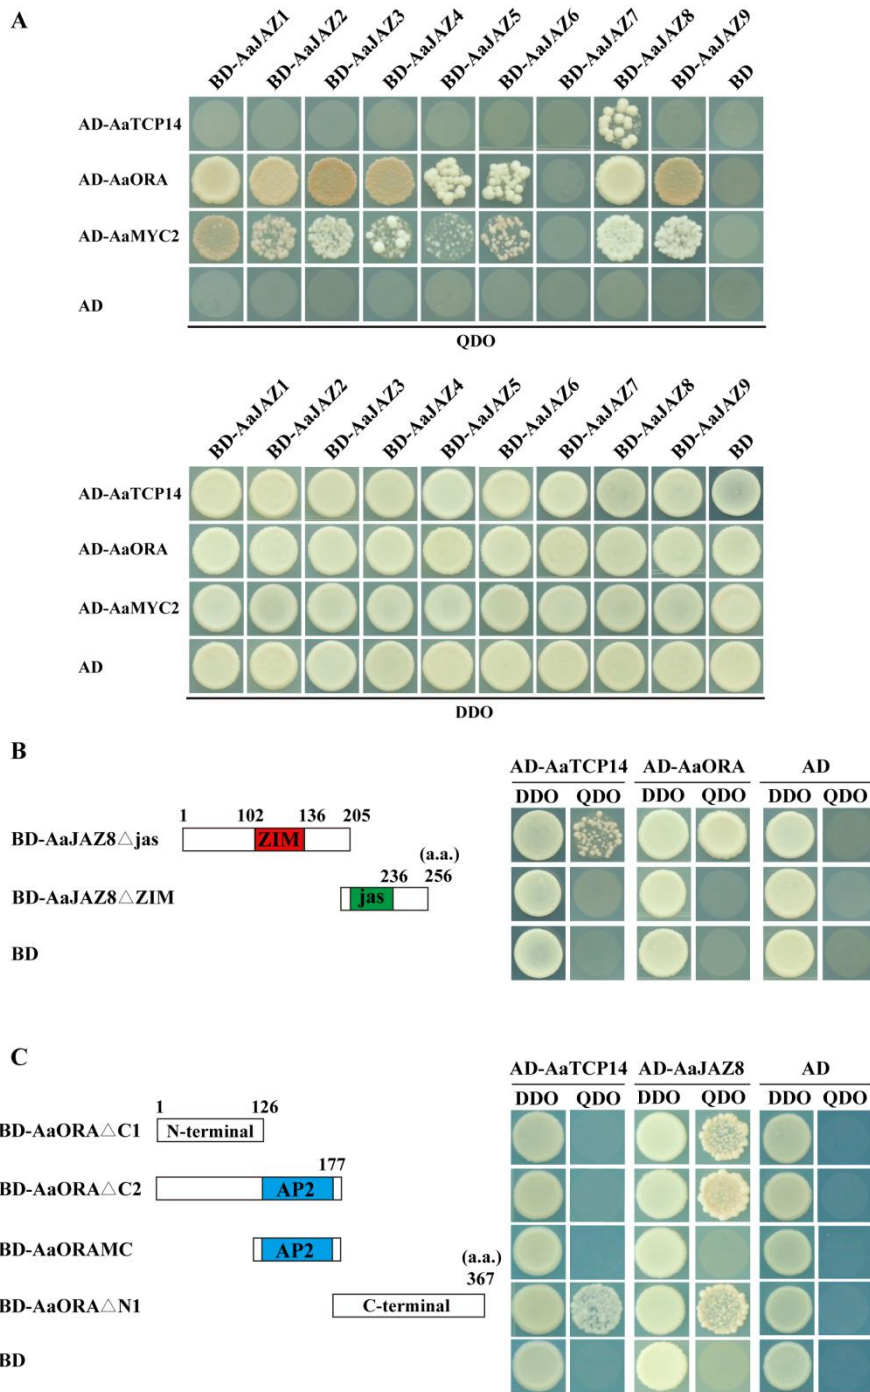

**Fig. S9. AaTCP14 and AaORA interact with AaJAZ proteins and mapping of the domains involved in the interaction between AaJAZ8, AaORA, and AaTCP14 using Y2H assays. (A)** Interactions between AaJAZ proteins and AaTCP14, AaORA or AaMYC2 in Yeast two hybrid (Y2H) assays. **(B)** Y2H assays showing the interactions between AaTCP14, AaORA and truncated versions of AaJAZ8. Left, schematic representations of the truncated AaJAZ8 protein used in this experiment. Numbers indicate the amino acid positions of the

truncated AaJAZ8 variants. The ZIM and jas domains are indicated by the red box and green box, respectively. Right, Y2H assays of protein interactions between AD-TCP14, AD-ORA and truncated versions of BD-JAZ8. (C) Y2H assays showing the interactions between AaTCP14, AaJAZ8 and truncated versions of AaORA. Left, schematic representations of the truncated AaORA protein used in this experiment. Numbers indicate the amino acid positions of the truncated AaORA variants. The AP2 domain is indicated by a blue box. Right, Y2H assays of protein interactions between AD-TCP14, AD-JAZ8 and truncated versions of BD-ORA. Transformed yeast cells were grown on the selective medium QDO and control medium DDO, and pictures were taken after 4 days of incubation at 30°C. The Y2H assays were repeated three times, and representative results are shown.

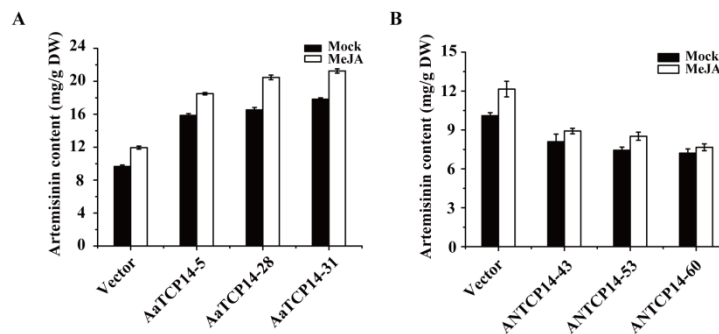

**Fig. S10. Artemisinin content in *AaTCP14* transgenic plants under MeJA treatment.** (A and B) Artemisinin content in *A. annua* *AaTCP14*-overexpression lines (A), *AaTCP14*-antisense lines (B) and plants transformed with the empty vector (control plants, labeled as Vector) was measured by HPLC after 48 h of treatment with 100  $\mu$ M MeJA or 0.1% ethanol (Mock). The data represent the means  $\pm$  SD of three replicates from three cutting propagations.

**Table S1. List of primers used in this study.**

| Name                                                | Primer sequence (5'-3')                          |
|-----------------------------------------------------|--------------------------------------------------|
| <b>Primers for the Dual-LUC assay</b>               |                                                  |
| 1300-AaORA-GFP-F                                    | GGGGCCCGGGTTCGACATGTTTGCTACTTGCATTCG             |
| 1300-AaORA-GFP-R                                    | TACCGGATCCACTAGTAAAAAAAAAAAAAGTCATCAT            |
| 1300-AaTCP14-GFP-F                                  | GGGGCCCGGGTTCGACATGGATGGTGGTGGTATGATCA           |
| 1300-AaTCP14-GFP-R                                  | TACCGGATCCACTAGTCGACTGATGGCTAGTTGTAT             |
| 1300-AaJAZ8-GFP-F                                   | GGGGCCCGGGTTCGACATGGAGAGGGATTTTATGGG             |
| 1300-AaJAZ8-GFP-R                                   | TACCGGATCCACTAGTCTTGCTTGCAACAGCGATAG             |
| pGreen0800-UBQ-F                                    | CGGTATCGATAAGCTTTCGCGATACAATTTCAATATA            |
| pGreen0800-UBQ-R                                    | ATCCCCGGGCTGCAGGGTCTTACCAGTGAGGGTCT              |
| pGreen0800-ADS-F                                    | CGGTATCGATAAGCTTCTCAGTATGGTGTTC AAC              |
| pGreen0800-ADS-R                                    | ATCCCCGGGCTGCAGGATTTTCAAAACTTTGAATA              |
| pGreen0800-CYP-F                                    | CGGTATCGATAAGCTTAATGGGTCAATTCGGGTTG              |
| pGreen0800-CYP-R                                    | ATCCCCGGGCTGCAGCATGCTTTTAGTATACTC                |
| pGreen0800-DBR2-F                                   | CGGTATCGATAAGCTTAAGAACTTCGAGATAGAAAA             |
| pGreen0800-DBR2-R                                   | ATCCCCGGGCTGCAGTCAGTATGGAGTTGGTAAA               |
| pGreen0800-ALDH1-F                                  | CGGTATCGATAAGCTTATGAACCATTAGAAGGGAAG             |
| pGreen0800-ALDH1-R                                  | ATCCCCGGGCTGCAGCTTTGTTTTTATGAAATTT               |
| <b>Primers for constructs used in the Y1H assay</b> |                                                  |
| pB42AD-AaORA-F                                      | TGCCTCTCCGAATTCATGTTTGCTACTTGCATTCG              |
| pB42AD-AaORA-R                                      | TCCAAAGCTTCTCGAGTCAAAAAAAAAAAAAAGTCAT            |
| pB42AD-AabZIP1-F                                    | TGCCTCTCCGAATTCATGAAC TACAAGAATTTTGG             |
| pB42AD-AabZIP1-R                                    | TCCAAAGCTTCTCGAGTCACCATGGACCGGAAAAGTG            |
| pB42AD-AaTCP14-F                                    | TGCCTCTCCGAATTCATGGATGGTGGTGGTATGATCA            |
| pB42AD-AaTCP14-R                                    | TCCAAAGCTTCTCGAGTCACGACTGATGGCTAGTTG             |
| ADSpro:LacZ-F                                       | TATTGGATCGGAATTCCTCGAGTATGGTGTTC AAC             |
| ADSpro:LacZ-R                                       | GAGCACATGCCTCGAGGATTTTCAAAACTTTGAATA             |
| CYP71AV1pro:LacZ-F                                  | TATTGGATCGGAATTC AATGGGTCAATTCGGGTTG             |
| CYP71AV1pro:LacZ-R                                  | GAGCACATGCCTCGAGCATGCTTTTAGTATACTC               |
| DBR2pro:LacZ-F                                      | TATTGGATCGGAATTC AAGAACTTCGAGATAGAAAA            |
| DBR2pro:LacZ-R                                      | GAGCACATGCCTCGAGTCAGTATGGAGTTGGTAAA              |
| ALDH1pro:LacZ-F                                     | TATTGGATCGGAATTCATGAACCATTAGAAGGGAAG             |
| ALDH1pro:LacZ-R                                     | GAGCACATGCCTCGAGCTTTGTTTTTATGAAATTT              |
| DBR2pro(3×D1):LacZ-F                                | AATTCCACGGTCCCACCTTCACGGTCCCACCTTCACGGTCCCACCTTC |
| DBR2pro(3×D1):LacZ-R                                | TCGAGAAAGTGGGACCGTCAAAGTGGGACCGTCAAAGTGGGACCGTGG |
| DBR2pro(3×D2):LacZ-F                                | AATTCTAAGCCCAAATTAAGCCCAAATTAAGCCCAAATC          |
| DBR2pro(3×D2):LacZ-R                                | TCGAGATTTGGGCTTAATTTGGGCTTAATTTGGGCTTAG          |
| ALDH1pro(3×A1):LacZ-F                               | AATTCTTGCCCCACCGTTCTGGCCCCACCGTTCTGGCCCCACCGTC   |
| ALDH1pro(3×A1):LacZ-R                               | TCGAGACGGTGGGCCAGAACGGTGGGCCAGAACGGTGGGCCAGAG    |
| ALDH1pro(3×A2):LacZ-F                               | AATTCAGCCCAATACCAGCCCAATACCAGCCCAATAC            |
| ALDH1pro(3×A2):LacZ-R                               | TCGAGTATTGGGCTGGTATTGGGCTGGTATTGGGCTGGG          |
| ALDH1pro(3×A3):LacZ-F                               | AATTCTTAGCCCAATATTAGCCCAATATTAGCCCAATAC          |

|                                                                  |                                                        |
|------------------------------------------------------------------|--------------------------------------------------------|
| ALDH1pro(3×A3):LacZ-R                                            | TCGAGTATTGGGCTAATATTGGGCTAATATTGGGCTAAG                |
| ABI5pro(3×B1):LacZ-F                                             | AATTCATGGGTCCCACACACCATGGGTCCCACACACCATGGGTCCCACACACC  |
| ABI5pro(3×B1):LacZ-R                                             | TCGAGGTGTGTGGGACCCATGGTGTGTGGGACCCATGGTGTGTGGGACCCATGG |
| <b>Primers used to generate DNA constructs for the Y2H assay</b> |                                                        |
| BD-AaORA-F                                                       | GGAGGACCTGCATATGATGTTTGCTACTTGCATTTCG                  |
| BD-AaORA-R                                                       | GGATCCCCGGGAATTCTCAAAAAAAAAAAAAAGTCAT                  |
| BD-AaORA-ΔC1-F                                                   | GGAGGACCTGCATATGATGTTTGCTACTTGCATTTCG                  |
| BD-AaORA-ΔC1-R                                                   | GGATCCCCGGGAATTCTCAACGCTCCTGACTCCTC                    |
| BD-AaORA-ΔC2-F                                                   | GGAGGACCTGCATATGATGTTTGCTACTTGCATTTCG                  |
| BD-AaORA-ΔC2-R                                                   | GGATCCCCGGGAATTCTCAACAGCTATTAAGAGAG                    |
| BD-AaORA-ΔN1-F                                                   | GGAGGACCTGCATATGTTAATAGGCTGTGATGATCG                   |
| BD-AaORA-ΔN1-R                                                   | GGATCCCCGGGAATTCTCAAAAAAAAAAAAAAGTCAT                  |
| BD-AaORA-ΔN2-F                                                   | GGAGGACCTGCATATGGTCAGGAGACGTCCGTGGGG                   |
| BD-AaORA-ΔN2-R                                                   | GGATCCCCGGGAATTCTCAAAAAAAAAAAAAAGTCAT                  |
| BD-AaORA-MC-F                                                    | GGAGGACCTGCATATGGTCAGGAGACGTCCGTGGGG                   |
| BD-AaORA-MC-R                                                    | GGATCCCCGGGAATTCTCAACAGCTATTAAGAGAG                    |
| BD-AaTCP14-F                                                     | GGAGGACCTGCATATGATGGATGGTGGTGTGATGATCA                 |
| BD-AaTCP14-R                                                     | GGATCCCCGGGAATTCTCACGACTGATGGCTAGTTG                   |
| BD-AaTCP14-ΔC1-F                                                 | GGAGGACCTGCATATGATGGATGGTGGTGTGATGATCA                 |
| BD-AaTCP14-ΔC1-R                                                 | GGATCCCCGGGAATTCTCATTTTTTCGAGGGTTCTGTTG                |
| BD-AaTCP14-ΔC2-F                                                 | GGAGGACCTGCATATGATGGATGGTGGTGTGATGATCA                 |
| BD-AaTCP14-ΔC2-R                                                 | GGATCCCCGGGAATTCTCAATTTAAGGAAGTGAAGTTAG                |
| BD-AaTCP14-ΔN1-F                                                 | GGAGGACCTGCATATGACTTCCTTAAATATTTCACT                   |
| BD-AaTCP14-ΔN1-R                                                 | GGATCCCCGGGAATTCTCACGACTGATGGCTAGTTG                   |
| BD-AaTCP14-ΔN2-F                                                 | GGAGGACCTGCATATGCCCTCGAAAAAACTAGCTCC                   |
| BD-AaTCP14-ΔN2-R                                                 | GGATCCCCGGGAATTCTCACGACTGATGGCTAGTTG                   |
| BD-AaTCP14-MC-F                                                  | GGAGGACCTGCATATGCCCTCGAAAAAACTAGCTCC                   |
| BD-AaTCP14-MC-R                                                  | GGATCCCCGGGAATTCTCAATTTAAGGAAGTGAAGTTAG                |
| BD-AaJAZ8-F                                                      | GGAGGACCTGCATATGATGGAGAGGGATTTTATGGG                   |
| BD-AaJAZ8-R                                                      | GGATCCCCGGGAATTCTCACTTGCTTGCAACAGCGA                   |
| BD-AaJAZ8-ΔZIM-F                                                 | GGAGGACCTGCATATGGGACAAGCGATGCAATCAGC                   |
| BD-AaJAZ8-ΔZIM-R                                                 | GGATCCCCGGGAATTCTCACTTGCTTGCAACAGCGA                   |
| BD-AaJAZ8-Δjas-F                                                 | GGAGGACCTGCATATGATGGAGAGGGATTTTATGGG                   |
| BD-AaJAZ8-Δjas-R                                                 | GGATCCCCGGGAATTCTCATTCATCGCTTGCCGA                     |
| BD-AaJAZ1-F                                                      | GGAGGACCTGCATATGATGTCGATGGCTAGAAACTT                   |
| BD-AaJAZ1-R                                                      | GGATCCCCGGGAATTCCTATACGTTGAGATCAAATT                   |
| BD-AaJAZ2-F                                                      | GGAGGACCTGCATATGATGTCATCGGCTAAACAATT                   |
| BD-AaJAZ2-R                                                      | GGATCCCCGGGAATTCCTATAAATTTAGATCGAACT                   |
| BD-AaJAZ3-F                                                      | GGAGGACCTGCATATGATGGAAAGGGATTTTATGGG                   |
| BD-AaJAZ3-R                                                      | GGATCCCCGGGAATTCTCACTTTGTATCATCTTTGC                   |
| BD-AaJAZ4-F                                                      | GGAGGACCTGCATATGATGGGTTCATCAGAAATGT                    |
| BD-AaJAZ4-R                                                      | GGATCCCCGGGAATTCTTATTGGACATGAGATTGTG                   |
| BD-AaJAZ5-F                                                      | GGAGGACCTGCATATGATGCTGAGACTGTGGATTC                    |

|                                                                               |                                        |
|-------------------------------------------------------------------------------|----------------------------------------|
| BD-AaJAZ5-R                                                                   | GGATCCCCGGGAATTCTTATTGGGCACCAGAAGATT   |
| BD-AaJAZ6-F                                                                   | GGAGGACCTGCATATGATGTCCGGCTGCCAACGTTT   |
| BD-AaJAZ6-R                                                                   | GGATCCCCGGGAATTCTTACATATTAAGGTCGAAAC   |
| BD-AaJAZ7-F                                                                   | GGAGGACCTGCATATGATGGAACGAGATTTTATGGG   |
| BD-AaJAZ7-R                                                                   | GGATCCCCGGGAATTCCTAATGCTCGCCTGCTGCTA   |
| BD-AaJAZ9-F                                                                   | GGAGGACCTGCATATGATGTTGAGATCACCTCGGT    |
| BD-AaJAZ9-R                                                                   | GGATCCCCGGGAATTCTCAATGCAAAGACAAGTCTC   |
| AD-AaTCP14-F                                                                  | AGATTACGCTCATATGATGGATGGTGGTGATGATCA   |
| AD-AaTCP14-R                                                                  | CACCCGGGTGGAATTCTCAGACTGATGGCTAGTTG    |
| AD-AaORA-F                                                                    | TGCCTCTCCCGAATTCATGTTTGCTACTTGCATTCTG  |
| AD-AaORA-R                                                                    | TCCAAAGCTTCTCGAGTCAAAAAAAAAAAAAAGTCAT  |
| AD-AaJAZ8-F                                                                   | AGATTACGCTCATATGATGGAGAGGGATTTTATGGG   |
| AD-AaJAZ8-R                                                                   | CACCCGGGTGGAATTCTCACTTGTGCAACAGCGA     |
| AD-AaMYC2-F                                                                   | AGATTACGCTCATATGATGACGATGAATATATGGAA   |
| AD-AaMYC2-R                                                                   | CACCCGGGTGGAATTCTTACCTAGGATCTGACATTC   |
| <b>Primers for constructs in pull-down assay</b>                              |                                        |
| pCold-AaTCP14-F                                                               | CGAAGGTAGGCATATGATGGATGGTGGTGATGATCA   |
| pCold-AaTCP14-R                                                               | AGATTACCTATCTAGATCAGACTGATGGCTAGTTG    |
| pGEX4T-1-AaORA-F                                                              | GGTCCGCGTGGATCCATGTTTGCTACTTGCATTCTG   |
| pGEX4T-1-AaORA-R                                                              | GTCGACCCGGGAATTCTCAAAAAAAAAAAAAAGTCAT  |
| <b>Primers for constructs used in the BiFC experiment</b>                     |                                        |
| Topo-AaTCP14-F                                                                | CACCATGGATGGTGGTGATGATCA               |
| Topo-AaTCP14-R                                                                | CGACTGATGGCTAGTTGTAT                   |
| Topo-AaORA-F                                                                  | CACCATGTTTGCTACTTGCATTCTG              |
| Topo-AaORA-R                                                                  | AAAAAAAAAAAAAGTCATCAT                  |
| Topo-AaJAZ8-F                                                                 | CACCATGGAGAGGGATTTTATGGG               |
| Topo-AaJAZ8-R                                                                 | CTTGCTTGCAACAGCGATAG                   |
| <b>Primers for constructs used in the Co-IP assays and degradation assay</b>  |                                        |
| 1300-AaORA-Flag-F                                                             | GGGGCCCGGGTTCGACATGTTTGCTACTTGCATTCTG  |
| 1300-AaORA-Flag-R                                                             | TACCGGATCCACTAGTAAAAAAAAAAAAAGTCATCAT  |
| 1300-AaJAZ8-Flag-F                                                            | GGGGCCCGGGTTCGACATGGAGAGGGATTTTATGGG   |
| 1300-AaJAZ8-Flag-R                                                            | TACCGGATCCACTAGTCTTGCTTGCAACAGCGATAG   |
| <b>Primers for constructs used in the subcellular localization experiment</b> |                                        |
| pHB-AaTCP14-YFP-F                                                             | CGAGTGCAGGAGCTCATGGATGGTGGTGATGATCA    |
| pHB-AaTCP14-YFP-R                                                             | TGCTCACCATACTAGTTCGACTGATGGCTAGTTGTATC |
| <b>Primers for analyzing genes expression</b>                                 |                                        |
| Actin-F                                                                       | CCAGGCTGTTTCAGTCTCTGTAT                |
| Actin-R                                                                       | CGCTCGGTAAGGATCTTCATCA                 |
| QPCR-AaTCP14-F                                                                | AGGGACGGTATCTACGGGTT                   |
| QPCR-AaTCP14-R                                                                | AGCGTGATGCGATTGAGA                     |
| QPCR-antisense-AaTCP14-F                                                      | GCTTCTCTCTCTTCACAT                     |
| QPCR-antisense-AaTCP14-R                                                      | GTGGCAGCACTTGTAGTTA                    |
| QPCR-ADS-F                                                                    | GGACTAGGTTTCAGGCTATG                   |



|                                                       |                                             |
|-------------------------------------------------------|---------------------------------------------|
| QPCR-ADS-R                                            | GGACTAGGTTTCAGGCTATG                        |
| QPCR-CYP71AV1-F                                       | TCATTTTCAGTCGCTT                            |
| QPCR-CYP71AV1-R                                       | CCAGTTTGCCTCAGTA                            |
| QPCR-DBR2-F                                           | ACTGCTGGTGGCTTTCTTA                         |
| QPCR-DBR2-R                                           | ACCCTCGACTTGTTCCTTA                         |
| QPCR-ALDH1-F                                          | GGACTTGCCTCAGGTGTAT                         |
| QPCR-ALDH1-R                                          | GTGCCTCTAATCCTTGTTT                         |
| QPCR-AaORA-F                                          | TCCTCCTCTTCATCCTCTATCG                      |
| QPCR-AaORA-R                                          | CGTTGTCCTTTCTGTCCTCAGT                      |
| QPCR-AaJAZ8-F                                         | ATGGTCCCTTTATGGCAGC                         |
| QPCR-AaJAZ8-R                                         | AATGATGCTTTGCGAGCC                          |
| QPCR-AaJAZ8 $\Delta$ jas-F                            | CATTCGGTCTTCCATCTACC                        |
| QPCR-AaJAZ8 $\Delta$ jas -R                           | CTGCCATAAAGGGACCATT                         |
| QPCR-AaMYC2-F                                         | TGAGGAAGTTACTGATACAGAATGG                   |
| QPCR-AaMYC2-R                                         | GTATTCCGAATACCTGACCTTGT                     |
| QPCR-AaGSW1-F                                         | TCTCGTCAAAGACACACACATT                      |
| QPCR-AaGSW1-R                                         | TTGTTTCGTAGTTGCTGTAGTGCT                    |
| QPCR-AaWRKY1-F                                        | TAGCGTTGATGATGGTTACA                        |
| QPCR-AaWRKY1-R                                        | ACAGGTGGCGAATAGACT                          |
| QPCR-AaAOS-F                                          | CAACTACTACCACAACCACTACTGG                   |
| QPCR-AaAOS-R                                          | TGTCGGGAAAGATTTAGCG                         |
| QPCR-AaAOC-F                                          | GTCTGCTTACCTACGGTTGGG                       |
| QPCR-AaAOC-R                                          | TTCTGTCTGTATGTATGCGCCT                      |
| QPCR-AaOPR3-F                                         | ATGGTCAAACAGAAGCGGG                         |
| QPCR-AaOPR3-R                                         | TGTCAAGAGAAGGGTAATCCG                       |
| QPCR-AaOPCL1-F                                        | ACAACCTCCACATTCACAG                         |
| QPCR-AaOPCL1-R                                        | GACGGATTCAACGGCTTT                          |
| <b>Primers for constructs used in the EMSA assays</b> |                                             |
| pCold-AaORA-F                                         | CGAAGGTAGGCATATGATGTTTGCTACTTGCATTTCG       |
| pCold-AaORA-R                                         | AGATTACCTATCTAGATCAAAAAAAAAAAGTCAT          |
| pCold-AaJAZ8-F                                        | CGAAGGTAGGCATATGATGGAGAGGGATTTTATGGG        |
| pCold-AaJAZ8-R                                        | AGATTACCTATCTAGATCACTTGTCTGCAACAGCGA        |
| D2q Probe-F                                           | GTCGCTAAACTTGCCACGGTCCCACCTTTTCAACTCTTATTA  |
| D2q Probe-R                                           | TAATAAGAGTTGAAAAAGTGGGACCGTGGCAAGTTTAGCGAC  |
| D2q Probe-mutant1-F                                   | GTCGCTAAACTTGCCACGGTAAACATTTTCAACTCTTATTA   |
| D2q Probe-mutant1-R                                   | TAATAAGAGTTGAAAAATGTTTACCGTGGCAAGTTTAGCGAC  |
| D2q Probe-mutant2-F                                   | GTCGCTAAACTTGCCACGGTGAACATTTTCAACTCTTATTA   |
| D2q Probe-mutant2-R                                   | TAATAAGAGTTGAAAAATGTTTCAACGTGGCAAGTTTAGCGAC |
| A1q Probe-F                                           | GGTTGGTTGCATTATCTGGCCCCACCGTAAACAATCAAATGC  |
| A1q Probe-R                                           | GCATTTGATTGTTTACGGTGGGGCCAGATAATGCAACCAACC  |
| A1q Probe-mutant1-F                                   | GGTTGGTTGCATTATCTGGCAAACACGTAAACAATCAAATGC  |
| A1q Probe-mutant1-R                                   | GCATTTGATTGTTTACGTGTTTGGCAGATAATGCAACCAACC  |
| A1q Probe-mutant2-F                                   | GGTTGGTTGCATTATCTTTAAAACACGTAAACAATCAAATGC  |

|                                                                                                                                                                        |                                            |
|------------------------------------------------------------------------------------------------------------------------------------------------------------------------|--------------------------------------------|
| A1q Probe-mutant2-R                                                                                                                                                    | GCATTTGATTGTTTACGTGTTTTAAAGATAATGCAACCAACC |
| <b>Primers for constructs used to generate the of AaTCP14, AaTCP14-AaORA, ANTCP14-AaORA, AaJAZ8, AaJAZ8<math>\Delta</math>jas and 1391Z-proTCP14 transgenic plants</b> |                                            |
| pHB- AaTCP14-Flag-F                                                                                                                                                    | GGATCCTACCTGCAGATGGATGGTGGTGATGATCA        |
| pHB- AaTCP14-Flag-R                                                                                                                                                    | AACGAAAGCTCTAGACGACTGATGGCTAGTTGTATC       |
| pHB- ANTCP14-F                                                                                                                                                         | CGAGCTGCAGGAGCTCCGACTGATGGCTAGTTGTAT       |
| pHB- ANTCP14-R                                                                                                                                                         | TGCTCACCATACTAGTATGGATGGTGGTGATGATCA       |
| 1305-AaTCP14-Myc-F                                                                                                                                                     | GGACTCTTGACCATGGTAATGGATGGTGGTGATGATCA     |
| 1305-AaTCP14-Myc-R                                                                                                                                                     | ATTCGAGCTGGTCACCTTATACCGAGTTCAAGTCCT       |
| 1305-AaORA-GFP-F                                                                                                                                                       | GACTCTTGACCATGGTAATGTTGCTACTTGCATTTCG      |
| 1305-AaORA-GFP-R                                                                                                                                                       | ATTCGAGCTGGTCACCTTACTTGTACAGCTCGTCCA       |
| 1305-ANTCP14-GFP-F                                                                                                                                                     | GGACTCTTGACCATGGTACGACTGATGGCTAGTTGTAT     |
| 1305-ANTCP14-GFP-R                                                                                                                                                     | ATTCGAGCTGGTCACCTTACTTGTACAGCTCGTCCA       |
| pHB-AaJAZ8-F                                                                                                                                                           | CGAGCTGCAGGAGCTCATGGAGAGGGATTTTATGGG       |
| pHB-AaJAZ8-R                                                                                                                                                           | TGCTCACCATACTAGTCTTGCTTGCAACAGCGATAG       |
| pHB-AaJAZ8 $\Delta$ jas-YFP-F                                                                                                                                          | CGAGCTGCAGGAGCTCATGGAGAGGGATTTTATGGG       |
| pHB-AaJAZ8 $\Delta$ jas-YFP-R                                                                                                                                          | TGCTCACCATACTAGTTTGCATCGCTTGTCCGAGTG       |
| 1391Z-proTCP14-F                                                                                                                                                       | CCAAGCTTGGCTGCAGGCATTGACCAGTGCAGATGACAGT   |
| 1391Z-proTCP14-R                                                                                                                                                       | GAATTCGCGGGGATCCAGAGAGATAACTAGGCGTGATTG    |
| <b>Primers for constructs used in Co-localization experiments</b>                                                                                                      |                                            |
| pHB-AaJAZ8-YFP-F                                                                                                                                                       | CGAGCTGCAGGAGCTCATGGAGAGGGATTTTATGGG       |
| pHB-AaJAZ8-YFP-R                                                                                                                                                       | TGCTCACCATACTAGTCTTGCTTGCAACAGCGATAG       |
| pHB-AaORA-CFP-F                                                                                                                                                        | GCAGCCCGGGGATCCATGTTTGTACTTGCATTTCG        |
| pHB-AaORA-CFP-R                                                                                                                                                        | TGCTCACCATACTAGTAAAAAAAAAAAAAGTCATCAT      |
| pHB- AaTCP14-CFP-F                                                                                                                                                     | GCAGCCCGGGGATCCATGGATGGTGGTGATGATCA        |
| pHB- AaTCP14-CFP-R                                                                                                                                                     | TGCTCACCATACTAGTCGACTGATGGCTAGTTGTATC      |
| <b>Primers for constructs used in Luciferase complementation assays</b>                                                                                                |                                            |
| Cluc-JAZ8-F                                                                                                                                                            | GTCCCGGGGCGGTACCATGGAGAGGGATTTTATGGG       |
| Cluc-JAZ8-R                                                                                                                                                            | AGCTCTGCAGGTCGACTCACTTGTGCAACAGCGA         |
| TCP14-Nluc-F                                                                                                                                                           | GGACGAGCTCGGTACCATGGATGGTGGTGATGATCA       |
| TCP14-Nluc-R                                                                                                                                                           | ACGAGATCTGGTCGACCGACTGATGGCTAGTTGTATC      |
| ORA-Nluc-F                                                                                                                                                             | GGACGAGCTCGGTACCATGTTTGTACTTGCATTTCG       |
| ORA-Nluc-R                                                                                                                                                             | ACGAGATCTGGTCGACAAAAAAAAAAAAAGTCATCAT      |
| Cluc-AaORA-F                                                                                                                                                           | GTCCCGGGGCGGTACCATGTTTGTACTTGCATTTCG       |
| Cluc-AaORA-R                                                                                                                                                           | AGCTCTGCAGGTCGACTCAAAAAAAAAAAAAAGTCATCAT   |
| <b>Primers for constructs used in the Y3H assay</b>                                                                                                                    |                                            |
| pBridge(BD)-AaTCP14-F                                                                                                                                                  | TGTATCGCCGAATTCATGGATGGTGGTGATGATCA        |
| pBridge(BD)-AaTCP14-R                                                                                                                                                  | GGCTGCAGGTCGACGTCACGACTGATGGCTAGTTG        |
| pBridge(Met)-AaJAZ8-F                                                                                                                                                  | AAAGGTGGCGGCCGAATGGAGAGGGATTTTATGGG        |
| pBridge(Met)-AaJAZ8-R                                                                                                                                                  | ATCAGCCCGAAGATCTTCACTTGTGCAACAGCGA         |
